# Supplementary material for: Seroprevalence of IgG antibodies against diphtheria antitoxin among migrant workers in Singapore, 2016–2019
Source: Springer Nature journal article supplement (doi:10.1186/s12889-022-12528-y), 2022-01-16
Supplement: MOESM1 [file 20036446]

# Seroprevalence of IgG antibodies against diphtheria antitoxin among migrant workers in Singapore, 2016–2019

Li Wei Ang, Qi Gao, Lin Cui, Aysha Farwin, Matthias Paul Han Sim Toh, Irving Charles Boudville, Mark I-Cheng Chen, Angela Chow, Raymond Tzer-Pin Lin, Vernon Jian Ming Lee, Yee Sin Leo

**Supplementary Table 1.** Seroprevalence of IgG antibodies against diphtheria antitoxin in Bangladesh, China, Indonesia and Malaysia

| Country        | Period of survey     | Study group                                                                                                                                                                          | Diphtheria seroprevalence                                                                 |                                                                                         |
|----------------|----------------------|--------------------------------------------------------------------------------------------------------------------------------------------------------------------------------------|-------------------------------------------------------------------------------------------|-----------------------------------------------------------------------------------------|
|                |                      |                                                                                                                                                                                      | Antitoxin titres $\geq 0.01$ IU/ml                                                        | Antitoxin titres $\geq 0.1$ IU/ml                                                       |
| Bangladesh [1] | 2018                 | 930 children aged 6 months – 14 years in Nayapara and makeshift settlements (MSs)                                                                                                    | 88% in 1–6 year-olds and 93% in 7–14 year-olds in MSs<br>99% in 1–6 year-olds in Nayapara | 63% in 1–6 year-olds and 77% in 7–14 year-olds in MSs, 91% in 1–6 year-olds in Nayapara |
| China [2]      | 2012                 | 2147 residents aged $\leq 74$ years in Beijing                                                                                                                                       | -                                                                                         | 52.5% in 25–29 year-olds, 43.7% in 30–34 year-olds, 37.4% in 35–39 year-olds            |
| Indonesia [3]  | 2012                 | 290 children aged 1–15 years in East Java; 147 in low incidence district of Kediri on the mainland of East Java, 143 in high incidence district of Bangkalan on the island of Madura | 93% in Kediri, 90% in Bangkalan                                                           | 71% in Kediri, 83% in Bangkalan                                                         |
| Malaysia [4]   | January to July 2008 | 152 medical students and staff in Universiti Putra Malaysia                                                                                                                          | 100%                                                                                      | 77.6%                                                                                   |

## References

- [1] Feldstein LR, Bennett SD, Estivariz CF, Cooley GM, Weil L, Billah MM, Uzzaman MS, Bohara R, Vandenant M, Adhikari JM, Leidman E, Hasan M, Akhtar S, Hasman A, Conklin L, Ehlman D, Alamgir A, Flora MS. Vaccination coverage survey and seroprevalence among forcibly displaced Rohingya children, Cox's Bazar, Bangladesh, 2018: A cross-sectional study. *PLoS Med.* 2020;17(3): e1003071. doi: 10.1371/journal.pmed.1003071.
- [2] Li X, Chen M, Zhang T, Li J, Zeng Y, Lu L. Seroepidemiology of diphtheria and pertussis in Beijing, China: A cross-sectional study. *Hum Vaccin Immunother.* 2015;11(10):2434-9. doi: 10.1080/21645515.2015.1062954.
- [3] Hughes G, Mikhail AFW, Husada D, Irawan E, Kafatos G, Bracebridge S, Pebody R, Efstratiou A. Seroprevalence and determinants of immunity to diphtheria for children living in two districts of contrasting incidence during an outbreak in East Java, Indonesia. *Pediatr Infect Dis J.* 2015;34(11): 1152-1156. doi: 10.1097/INF.0000000000000846.
- [4] Hamat RA, Malina O, Chua YJ, Seng KL, Zubaidah M, Norhanim K, Chong SS, Weng PL, Farida J. *Malaysian Journal of Medicine and Health Sciences*; 2011;7(1): 27-34.

**Supplementary Table 2.** Diphtheria tetanus toxoid and pertussis (DTP3) vaccination coverage (%) among 1-year-olds and incidence rate per million population of diphtheria cases in Bangladesh, China, India, Indonesia, Malaysia, Myanmar and the Philippines

| Country     | Year childhood diphtheria vaccination introduced | Age recommended    | DTP3 coverage (%) |           | Incidence rate per million population in 2010-2019 |                     |
|-------------|--------------------------------------------------|--------------------|-------------------|-----------|----------------------------------------------------|---------------------|
|             |                                                  |                    | Year 1991         | Year 2019 | Average annual rate                                | Highest annual rate |
| Bangladesh  | 1985                                             | 6, 10, 14 weeks    | 74                | 98        | 0.09                                               | 0.22                |
| China       | 1978                                             | 3, 4, 5 months     | 94                | 99        | 0.00                                               | 0.00                |
| India       | 1978                                             | 6, 10, 14 weeks    | 57                | 91        | 3.72                                               | 7.04                |
| Indonesia   | 1985                                             | 2, 3, 4, 18 months | 62                | 85        | 2.52                                               | 4.80                |
| Malaysia    | 1964                                             | 2, 3, 5, 18 months | 92                | 98        | 0.36                                               | 1.03                |
| Myanmar     | 1980                                             | 2, 4, 6 months     | 66                | 90        | 1.01                                               | 2.56                |
| Philippines | 1979                                             | 6, 10, 14 weeks    | 90                | 65        | 0.59                                               | 1.86                |

Data sources:

World Health Organization. Diphtheria tetanus toxoid and pertussis (DTP3) immunization coverage among 1-year-olds (%)

[https://www.who.int/data/gho/data/indicators/indicator-details/GHO/diphtheria-tetanus-toxoid-and-pertussis-\(dtp3\)-immunization-coverage-among-1-year-olds-\(-\)](https://www.who.int/data/gho/data/indicators/indicator-details/GHO/diphtheria-tetanus-toxoid-and-pertussis-(dtp3)-immunization-coverage-among-1-year-olds-(-)). Accessed 19 September 2020.

World Health Organization. Diphtheria reported cases. Last update: 15-Oct-2020 (data received as of 12-Oct-20).

[https://apps.who.int/immunization\\_monitoring/globalsummary/timeseries/tsincidediphtheria.html](https://apps.who.int/immunization_monitoring/globalsummary/timeseries/tsincidediphtheria.html).

Accessed 9 April 2021.
